# Supplementary material
Source: PubMed Central journal article supplement (PMC3198366)
Supplement: 1111138108_pnas.201111138SI.pdf [file 1111138108_pnas.201111138SI.pdf]

# Supporting Information

Yamamoto-Sugitani et al. 10.1073/pnas.1111138108

## SI Materials and Methods

**Assays for Growth Inhibition, Cell Death, and DNA Content.** Cell proliferation was determined with a modified MTT assay by using a Cell Counting Kit-8 (Dohjindo). Cell death was defined in terms of the intracellular incorporation of propidium iodide as determined by flow cytometry. For DNA content analysis, cells were fixed with ice-cold 70% ethanol, stained with propidium iodide, and then analyzed with flow cytometry. The percentage of the sub-G1 fraction, which was assumed to be undergoing apoptosis, was determined by means of CellQuest software (BD).

**Chemotactic Cell Migration Assay.** The cell migration assay was performed in 12-well chemotaxis chamber plates (Corning). Cells ( $5.0 \times 10^5$ ) in serum-free medium were seeded into the upper chambers, and serum-free medium or CM/HS-5 was added to the lower chambers. The number of cells that had transmigrated into the lower chamber was counted with a FACSCalibur flow cytometer with appropriate gating for 5 min at a high flow rate after 3, 6, and 24 h incubation. The experiments were performed in

triplicate. The number of cells that had transmigrated to the serum-free medium after 3 h incubation was assigned a value of 1.0.

**Measurement of Gal-3 Concentration in Media.** Gal-3 concentrations of CM/MYL, CM/MYL/G3, CM/K562, and CM/K562/G3 were measured by using Human Galectin-3 Assay Kit (Immuno-Biological Laboratories) according to manufacturer instructions.

**Western Blot Analysis.** Primary Abs used were those against Actin (Sigma-Aldrich), Gal-3 (clone A3A12), Mcl-1 (Santa Cruz Biotechnology), Bcl-2 (clone 100; Upstate Biotechnology), Bad, Bcl-X<sub>L</sub> (Stressgen), Bim (3C5; gift from Anderas Strasser, Walter and Eliza Hall Institute, Victoria, Australia), Akt, Erk, phospho (p)-Akt, p-Bad<sup>Ser112</sup>, and p-Erk (Cell Signaling Technology).

**Immunohistochemical Staining.** Approval was obtained from the institutional review board at Kyoto Prefectural University of Medicine for a study using patient-derived samples. Formalin-fixed and paraffin-embedded tissues were examined by staining with anti-Gal-3 monoclonal Ab.









**Table S1. Genes modified by adhesion to FN and coculturing with HS-5 in MYL cells**

| Type                   | Genes up-regulated by >2 folds                                                                                                                                                                                                                                                                                                                                                                                                                                                                                        | Genes down-regulated by <2 folds                                                                                                                                                                                                       |
|------------------------|-----------------------------------------------------------------------------------------------------------------------------------------------------------------------------------------------------------------------------------------------------------------------------------------------------------------------------------------------------------------------------------------------------------------------------------------------------------------------------------------------------------------------|----------------------------------------------------------------------------------------------------------------------------------------------------------------------------------------------------------------------------------------|
| Accumulation of cells  | BCL3, CFLAR, CR1, CXCL2, EGR1, ICAM1, IER3, IL8, IL1B, OSM, PLAU, TNFSF10, VEGFA                                                                                                                                                                                                                                                                                                                                                                                                                                      | —                                                                                                                                                                                                                                      |
| Cell adhesion          | AXL, CD48, CD55, CD97, CR1, CXCL2, EGR1, ICAM1, IL8, IL1B, GAL-3, LOXL2, MMP15, NEDD9, NTRK1, OSM, PIK3CA, PLAU, PPAR, S1PR1, SLC3A2, TFPI, TGFB11, VEGFA                                                                                                                                                                                                                                                                                                                                                             | AKT2, ITGB1                                                                                                                                                                                                                            |
| Apoptosis              | ADM, AKAP12, ASNS, ATF3, AXL, BCL3, BEX2, BHLHB2, BTG1, CAV1, CD48, CD55, CD69, CEBPB, CFLAR, CR1, CSTA, CTH, CXCL2, DDIT4, DNASE2, DUSP6, EGR1, FOXO1, GGT1, HERPUD1, ICAM1, IER3, IL8, IL15RA, IL1B, IL2RA, LAIR1, GAL-3, LOXL2, MYCT1, NDRG1, NEDD9, NFKBIZ, NTRK1, OSM, PAX6, PCGF2, PIK3CA, PIM2 (includes EG:11040), PLAU, PLK2, PPAR, PRF1, PTAFR, PTPRE, RHEB, S1PR1, SAT1, SLC2A3, SOCS3, TBXA2R, TGFB11, TNFRSF10B, TNFRSF10D, TNFSF10, TRA $\alpha$ , TRIB3, UACA, VEGFA, WNT11, XBP1                      | AKT2, ARHGDI, ATF5, BRF1, CALR, CDC25A, CDK6, CEBPA, COL2A1, CTBP1, GALNT10, HMGA1, ID3, IL9R, ING5, IRAK1, ITGB1, MPRIP, NF2, PA2G4, PAK2, PDCD6, POLR2A, PRDM2, PRKACA, SPN, SRF, TCF3, TXN, YY1                                     |
| Cell cycle progression | ASNS, ATF3, CAV1, CCNG2, EGR1, FOXO1, HBP1, HPGD, IER3, IL8, IL1B, IRF9, MX11, OSM, PAX6, PCGF2, PLK2, S1PR1, TNFSF10, VEGFA, XBP1                                                                                                                                                                                                                                                                                                                                                                                    | ARID1A, ATF5, CALR, CDC25A, CDK6, CEBPA, ID3, ITGB1, NUCKS1, PA2G4, SMARCA4, TCF3, TRRAP, YY1                                                                                                                                          |
| Cell cycle arrest      | —                                                                                                                                                                                                                                                                                                                                                                                                                                                                                                                     | ARID1A, CALR, CDC25A, CDK6, CEBPA, ITGB1, PA2G4, SMARCA4, TCF3, YY1                                                                                                                                                                    |
| Cell division arrest   | —                                                                                                                                                                                                                                                                                                                                                                                                                                                                                                                     | ARID1A, ATF5, CALR, CDC25A, CDK6, CEBPA, ID3, ITGB1, PA2G4, SMARCA4, TCF3, TRRAP, YY1, HMGA1                                                                                                                                           |
| Cell death             | ADM, AKAP12, APOL1, ARAP3, ASNS, ATF3, AXL, BCL3, BEX2, BHLHB2, BTG1, CAV1, CD48, CD55, CD69, CEBPB, CFLAR, CR1, CSTA, CTH, CXCL2, DDIT4, DNASE2, DUSP6, EGR1, FOXO1, GGT1, HERPUD1, ICAM1, IER3, IL8, IL15RA, IL1B, IL2RA, LAIR1, GAL-3, LOXL2, MYCT1, NDRG1, NEDD9, NFKBIZ, NTRK1, OSM, PAX6, PCGF2, PIK3CA, PIM2 (includes EG:11040), PLAU, PLK2, PPAR, PRF1, PTAFR, PTPRE, RHEB, S100P, S1PR1, SAT1, SLC2A3, SOCS3, TBXA2R, TGFB11, TNFRSF10B, TNFRSF10D, TNFSF10, TRA $\alpha$ , TRIB3, UACA, VEGFA, WNT11, XBP1 | AKT2, ARHGDI, ATF5, BRF1, CALR, CDC25A, CDK6, CEBPA, COL2A1, CTBP1, GALNT10, HMGA1, ID3, IL9R, ING5, IRAK1, ITGB1, MPRIP, NF2, PA2G4, PAK2, PDCD6, POLR2A, PRDM2, PRKACA, RAD51L3, SPN, SRF, TCF3, TIMM50, TXN, UBTF, YY1              |
| Cell movement          | ADM, AXL, CAV1, CD48, CD55, CD69, CD97, CXCL2, ICAM1, IL8, IL1B, IL2RA, GAL-3, MYLIP, NEDD9, NFKBIZ, OSM, PLAU, PRF1, PRKG1, PTAFR, S1PR1, SOCS3, VEGFA                                                                                                                                                                                                                                                                                                                                                               | ITGB1                                                                                                                                                                                                                                  |
| Cell growth            | ADM, AKAP12, ATF3, BTG1, CAV1, CD55, CEBPB, CTH, CTSF, CXCL2, DUSP6, EGR1, EIF1, FOXO1, GGT1, HBP1, HNRNP, HPGD, IER3, IFI30, IL8, IL15RA, IL1B, IL2RA, GAL-3, LITAF, MAFF, MMP15, MYCT1, NTRK1, OSM, PCGF2, PIK3CA, PIM2 (includes EG:11040), PLAU, PLK2, S1PR1, SAT1, SLC3A2, SOCS3, TGFB11, TNFSF10, VEGFA, WWTR1, XBP1                                                                                                                                                                                            | AKT2, ATF5, BAT2D1, BRF1, CALR, CBX2, CDC42BPB, CDK6, CEBPA, COL2A1, CTBP1, CYP1A1, EIF4G1, GTPBP1, HMGA1, ID3, IL9R, ITGB1, MAZ, MYBBP1A, NF2, PA2G4, PIP4K2B, PRKACA, SLC19A1, SMARCA4, SOS1, SRF, TCF3, TRRAP, TXN, UBTF            |
| Cell invasion          | ADM, ATF3, AXL, CAV1, CD97, ETV1, HBP1, IL8, IL1B, MMP15, NTRK1, OSM, PLAU, S100P, TBXA2R, TNFSF10, VEGFA                                                                                                                                                                                                                                                                                                                                                                                                             | AKT2, ITGB1, YY1                                                                                                                                                                                                                       |
| Cell migration         | ADM, ARAP3, AXL, CAV1, CD69, CD97, CXCL2, EGFL7, EGR1, FOXO1, GNG12, ICAM1, IL8, IL15RA, IL1B, GAL-3, MARCKS (includes EG:4082), NEDD9, OSM, PAX6, PIK3C2B, PLAU, PLXNA1, PPAR, PRKG1, S100P, S1PR1, SEMA4C, SLC3A2, SOCS3, TFPI, TNFSF10, VEGFA, WARS, WNT11, WWTR1                                                                                                                                                                                                                                                  | —                                                                                                                                                                                                                                      |
| Cell morphology        | ADM, ATF3, CAV1, CEBPB, EGR1, FOXO1, HBP1, IL1B, GAL-3, MARCKS (includes EG:4082), MYCT1, OSM, PAX6, PRF1, PRKG1, PTPRE, RARRES3, TBXA2R, TGFB11, VEGFA, WWTR1                                                                                                                                                                                                                                                                                                                                                        | CDC42BPB, CDC42SE1, GRLF1, IRAK1, ITGB1, MPRIP, NF2, SMARCA4, SOS1, SPN, SRF, TLN1, WASF2                                                                                                                                              |
| Cell proliferation     | ADM, ATF3, AXL, BCL3, BTG1, CAV1, CCNG2, CD48, CEBPB, CFLAR, CR1, CTH, CXCL2, EGR1, ENPEP, FOXO1, GGT1, H19, HLA-E, HPGD, ICAM1, IFI30, IFITM1, IL8, IL15RA, IL1B, IL2RA, KLF9, LAIR1, GAL-3, MX11, NTRK1, OSM, PAX6, PCGF2, PIK3CA, PIM2 (includes EG:11040), PLAU, PPAR, PRKG1, PTAFR, PTPRE, PTPRR, RARRES3, S100P, S1PR1, SAT1, SEMA4C, SLC7A11, SOCS3, TBXA2R, TFPI, TGFB11, TNFRSF10B, TNFSF10, TOM1L1, TRA $\alpha$ , VEGFA, WARS, WNT11                                                                       | AKT2, ATF5, CALR, CDC25A, CDK6, CEBPA, COL2A1, CTBP1, DDX11, FBRS, HMGA1, HS6ST1, ID3, IL9R, ING5, IRAK1, ITGB1, MAPKAPK2, MYBBP1A, NF2, PA2G4, PATZ1, PIP4K2B, PRKACA, SLC19A1, SMARCA4, SOS1, SPN, SRF, TCF3, TRRAP, TXN, WASF2, YY1 |



**Table S1. Cont.**

| Type          | Genes up-regulated by >2 folds                                                                                                                                                                                                                                | Genes down-regulated by <2 folds                                                                                                                                                                                                                                                                                                     |
|---------------|---------------------------------------------------------------------------------------------------------------------------------------------------------------------------------------------------------------------------------------------------------------|--------------------------------------------------------------------------------------------------------------------------------------------------------------------------------------------------------------------------------------------------------------------------------------------------------------------------------------|
| Transcription | ATF3, BCL3, BHLHB2, BTG1, CAV1, CBY1, CEBPB, CFLAR, CREB3L4, EGR1, ETV1, FOXO1, IL10RB, IL1B, IRF9, KLF9, LITAF, MAFF, MXI1, OSM, PAX6, PCGF2, PLK2, PPAR, PRKG1, PTPRR, RARRES3, S1PR1, SOCS3, TGFB11, TNFRSF10B, TNFSF10, TOM1L1, TRIB3, VEGFA, WWTR1, XBP1 | ARID1A, ATF5, BRF1, CALR, CBX2, CCNK, CEBPA, CHD4, CTBP1, EHMT1, EHMT2, FOXK2, GRLF1, HBZ, HMGA1, ID3, IRAK1, ITGB1, LOC339344, MAPKAPK2, MAZ, MLXIP, MYBBP1A, NR2F2, NR2F6, PA2G4, PAK2, PATZ1, PBX2, PHF12, PITX1, POLR2A, PRDM2, PRKACA, RBM14, SLC2A4RG, SMARCA4, SORBS3, SOS1, SPEN, SRCAP, SRF, TCF3, TRRAP, UBTf, YY1, ZNF326 |

**Table S2. Gal-3 expression in patient-derived untreated leukemic cells**

| Pt. no. | Disease status      | ANC ( $\times 10^9/L$ ) | Blast, % | Ph <sup>+</sup> cells, % | Gal3 <sup>+</sup> cells | Treatment outcome             |
|---------|---------------------|-------------------------|----------|--------------------------|-------------------------|-------------------------------|
| 1       | CML-CP              | 583.0                   | 0.0      | 99.0                     | +++                     | CCyR with IM                  |
| 2       | CML-CP              | 888.0                   | 0.0      | 97.0                     | +++                     | CCyR with IM                  |
| 3       | CML-CP              | 916.0                   | 0.8      | 100.0                    | +++                     | CCyR with IM                  |
| 4       | CML-CP              | 200.0                   | 0.8      | 95.0                     | +++                     | IM intolerance, MMR with Das  |
| 5       | CML-CP              | 1375.0                  | 0.4      | 95.0                     | +++                     | CCyR with IM                  |
| 6       | CML-CP              | 996.0                   | 2.4      | 99.0                     | +++                     | MMR with IM                   |
| 7       | CML-CP              | NA                      | 0.8      | NA                       | +++                     | Failure with IM, Nilo and Das |
| 8       | CML-CP              | 568.0                   | 0.8      | 100.0                    | +++                     | CCyR with IM                  |
| 9       | CML-CP              | 1968.0                  | 0.4      | 96.0                     | +++                     | IM intolerance, CCyR with Bos |
| 10      | CML-CP              | NA                      | 2.6      | 96.0                     | +++                     | IM intolerance; MMR with Nilo |
| 11      | CML-AP              | 62.0                    | 18.7     | 87.0                     | +++                     | CCyR with IM                  |
| 12      | CML-LBC             | 407.0                   | 95.4     | 98.0                     | —                       | Failure with IM+CTx           |
| 13      | CML-LBC             | 892.0                   | 85.6     | 96.0                     | +                       | Failure with IM+CTx           |
| 14      | CML-MBC             | 780.0                   | 77.5     | 87.4                     | +                       | MMR with IM+CTx               |
| 15      | CML-MBC             | 329.0                   | 81.3     | 98.0                     | +                       | HCR with IM+CTx               |
| 16      | CML-MBC             | 182.0                   | 29.2     | 81.0                     | ++                      | Failure with CTx              |
| 17      | CML-MBC             | 458.0                   | 36.1     | 97.0                     | ++                      | HCR with IM+CTx               |
| 18      | CML-MBC             | 424.0                   | 56.0     | 95.0                     | ++                      | HCR with IM+CTx               |
| 19      | CML-MBC             | 957.0                   | 51.4     | 100.0                    | ++                      | MMR with IM+CTx               |
| 20      | CML-MBC             | 907.0                   | 46.8     | 100.0                    | +++                     | PCyR with IM+CTx, relapse     |
| 21      | Ph <sup>+</sup> AML | 512.0                   | 28.8     | 92.0                     | +++                     | MMR with IM+CTx               |
| 22      | Ph <sup>+</sup> ALL | 706.0                   | 97.8     | 100.0                    | —                       | CMR with IM+CTx               |
| 23      | Ph <sup>+</sup> ALL | NA                      | 86.8     | NA                       | —                       | CCyR with IM+CTx              |
| 24      | Ph <sup>+</sup> ALL | 1581.0                  | 94.2     | 35.0                     | +                       | MMR with IM+CTx               |
| 25      | Ph <sup>+</sup> ALL | 704.0                   | 84.6     | 25.0                     | —                       | MMR with IM+CTx               |
| 26      | AML (M0)            | 61.0                    | 80.4     | NA                       | +                       | CR with CTx                   |
| 27      | AML (M3)            | 359.0                   | 84.4     | NA                       | —                       | CR with ATRA+CTx              |
| 28      | AML (M3)            | 105.0                   | 79.2     | NA                       | +                       | CR with ATRA+CTx              |
| 29      | AML (M4)            | 62.0                    | 25.8     | NA                       | +                       | CR with CTx                   |
| 30      | AML (M5a)           | 594.0                   | 84.0     | NA                       | +                       | Primary refractory to CTx     |
| 31      | Common ALL (L2)     | 460.0                   | 87.6     | NA                       | +                       | CR with CTx                   |
| 32      | Healthy volunteer   | 123.0                   | 0.0      | NA                       | +                       | NA                            |
| 33      | Healthy volunteer   | 50.0                    | 1.2      | NA                       | +                       | NA                            |
| 34      | Healthy volunteer   | 144.0                   | 0.8      | NA                       | +                       | NA                            |

Frequency of Gal-3-positive cells in BM clot sample was scored and represented as follows: —, <5% cells positive for cytoplasmic Gal-3 expression; +, 5–20% cells are positive for Gal-3; ++, approximately 21–50% cells are positive for Gal-3; +++, >50% cells are positive for Gal-3. ALL, acute lymphoblastic leukemia; AML, acute myelogenous leukemia; ANC, all nucleated BM cells; ATRA, all-*trans* retinoic acid; Bos, bosutinib; CCyR, complete cytogenetic response; CR, complete remission; CTx, conventional chemotherapy; MMR, major molecular response; NA, not applicable; Nilo, nilotinib.

**Table S3. Gal-3 expression in patient-derived leukemic cells**

| Pt. no. | Diagnosis           | Disease status | ANC ( $\times 10^9/L$ ) | Blast, % | Ph <sup>+</sup> cells, % | Gal3 <sup>+</sup> cells |
|---------|---------------------|----------------|-------------------------|----------|--------------------------|-------------------------|
| 19      | CML-BC              | Onset          | 957.0                   | 51.4     | 100.0                    | ++                      |
|         |                     | First relapse  | 44.0                    | 2.8      | 26.0                     | ++                      |
|         |                     | Second relapse | 66.0                    | 72.0     | 95.0                     | +                       |
| 22      | Ph <sup>+</sup> ALL | Onset          | 706.0                   | 97.8     | 100.0                    | —                       |
|         |                     | Relapse        | 71.0                    | 77.8     | 70.0                     | +                       |
| 23      | Ph <sup>+</sup> ALL | Onset          | NA                      | 86.8     | NA                       | —                       |
|         |                     | Relapse        | 122.0                   | 52.2     | 80.0                     | ++                      |
| 24      | Ph <sup>+</sup> ALL | Onset          | 1581.0                  | 94.2     | 35.0                     | +                       |
|         |                     | Relapse        | 150.0                   | 80.0     | 87.0                     | +                       |

Gal-3 expression in leukemic cells at different disease stages was immunohistochemically examined in patients 19, 22, 23, and 24 (Table 1). Frequency of Gal-3-positive cells in BM clot sample was scored and represented as follows: —, <5% cells positive for cytoplasmic Gal-3 expression; +, 5–20% cells are positive for Gal-3; ++, approximately 21–50% cells are positive for Gal-3; +++, >50% cells are positive for Gal-3. ALL, acute lymphoblastic leukemia; ANC, all nucleated BM cells; NA, not applicable.
